# Supplementary material for: Development of a novel predictive model for a successful stone removal after flexible ureteroscopic lithotripsy based on ipsilateral renal function: a single-centre, retrospective cohort study in China
Source: HighWire-hosted journal article supplement (doi:10.1136/bmjopen-2021-059319), 2022-06-01
Supplement: bmjopen-2021-059319supp001_data_supplement.pdf [file bmjopen-2021-059319supp001_data_supplement.pdf]

Supplementary Table 1. Variables identified according to the leave-one cross validation LASSO regression and stepwise multivariate logistics regression. The 1-SE criteria were chosen to build a concise model. LASSO: Least absolute shrinkage and selection operator regression; GFR: glomerular filtration rate; BMI: Body mass index.

| Variables identified by LASSO           | Intercept | GFR of treated kidney (ml/min) | Stone volume (cm <sup>3</sup> ) | BMI (kg/m <sup>2</sup> ) | Age (years) | Lower calyx stone (Yes) |
|-----------------------------------------|-----------|--------------------------------|---------------------------------|--------------------------|-------------|-------------------------|
| LASSO coefficients ( $\lambda=0.0416$ ) | -0.887    | -0.025                         | 0.141                           | 0.025                    | 0.005       | 0.095                   |
| Logistics coefficients                  | -2.854    | -0.048                         | 0.377                           | 0.095                    | 0.018       | 0.589                   |
